# Supplementary material for: Current practice and usual care of major cervical disorders in Korea: A cross-sectional study of Korean health insurance review and assessment service national patient sample data
Source: PubMed Central journal article supplement (PMC5704872; doi:10.1097/md.0000000000008751), 2017-11-17
Supplement: medi-96-e8751-s001.pdf [file medi-96-e8751-s001.pdf]

**S1 Table.** Total analgesics use for sprain/strain of cervical spine, cervical intervertebral disc displacement, and cervicalgia (according to 5<sup>th</sup> level Anatomical Therapeutic Chemical (ATC) Classification System codes)

| ATC code                   | Outpatient+Inpatient            |       |                                           |       |             |       | Inpatient                       |       |                                           |       |             |       | Outpatient                      |       |                                           |       |             |       |
|----------------------------|---------------------------------|-------|-------------------------------------------|-------|-------------|-------|---------------------------------|-------|-------------------------------------------|-------|-------------|-------|---------------------------------|-------|-------------------------------------------|-------|-------------|-------|
|                            | Sprain/Strain of cervical spine |       | Cervical intervertebral disc displacement |       | Cervicalgia |       | Sprain/Strain of cervical spine |       | Cervical intervertebral disc displacement |       | Cervicalgia |       | Sprain/Strain of cervical spine |       | Cervical intervertebral disc displacement |       | Cervicalgia |       |
|                            | N=17421                         | %     | N=14044                                   | %     | N=21447     | %     | N=673                           | %     | N=1561                                    | %     | N=972       | %     | N=16951                         | %     | N=13517                                   | %     | N=21049     | %     |
| <b>Non-narcotics</b>       |                                 |       |                                           |       |             |       |                                 |       |                                           |       |             |       |                                 |       |                                           |       |             |       |
| Aceclofenac                | 4,418                           | 25.36 | 4,222                                     | 30.06 | 5,466       | 25.49 | 175                             | 26.00 | 561                                       | 35.94 | 338         | 34.77 | 4,261                           | 25.14 | 3,905                                     | 28.89 | 5,307       | 25.21 |
| Diclofenac                 | 4,071                           | 23.37 | 3,210                                     | 22.86 | 3,391       | 15.81 | 337                             | 50.07 | 658                                       | 42.15 | 281         | 28.91 | 3,759                           | 22.18 | 2,686                                     | 19.87 | 3,195       | 15.18 |
| Tramadol                   | 3,079                           | 17.67 | 2,597                                     | 18.49 | 2,909       | 13.56 | 279                             | 41.46 | 464                                       | 29.72 | 271         | 27.88 | 2,820                           | 16.64 | 2,206                                     | 16.32 | 2,708       | 12.87 |
| Loxoprofen sodium hydrate* | 3,072                           | 17.63 | 2,232                                     | 15.89 | 2,927       | 13.65 | 124                             | 18.42 | 234                                       | 14.99 | 112         | 11.52 | 2,965                           | 17.49 | 2,059                                     | 15.23 | 2,847       | 13.53 |
| Talniflumate*              | 3,102                           | 17.81 | 2,217                                     | 15.79 | 2,718       | 12.67 | 160                             | 23.77 | 279                                       | 17.87 | 129         | 13.27 | 2,952                           | 17.41 | 2,002                                     | 14.81 | 2,634       | 12.51 |
| Tramadol, combinations     | 1,397                           | 8.02  | 1,838                                     | 13.09 | 2,097       | 9.78  | 54                              | 8.02  | 176                                       | 11.27 | 70          | 7.20  | 1,345                           | 7.93  | 1,711                                     | 12.66 | 2,055       | 9.76  |
| Zaltoprofen*               | 758                             | 4.35  | 615                                       | 4.38  | 829         | 3.87  | 23                              | 3.42  | 67                                        | 4.29  | 34          | 3.50  | 739                             | 4.36  | 573                                       | 4.24  | 805         | 3.82  |
| Chlorphenesin carbamate*   | 689                             | 3.95  | 408                                       | 2.91  | 675         | 3.15  | 16                              | 2.38  | 32                                        | 2.05  | 18          | 1.85  | 674                             | 3.98  | 383                                       | 2.83  | 662         | 3.15  |
| Meloxicam                  | 258                             | 1.48  | 670                                       | 4.77  | 728         | 3.39  | 8                               | 1.19  | 72                                        | 4.61  | 36          | 3.70  | 251                             | 1.48  | 620                                       | 4.59  | 704         | 3.34  |
| Paracetamol                | 486                             | 2.79  | 263                                       | 1.87  | 424         | 1.98  | 28                              | 4.16  | 39                                        | 2.50  | 27          | 2.78  | 458                             | 2.70  | 226                                       | 1.67  | 402         | 1.91  |
| Piroxicam                  | 257                             | 1.48  | 362                                       | 2.58  | 521         | 2.43  | 32                              | 4.75  | 71                                        | 4.55  | 47          | 4.84  | 229                             | 1.35  | 298                                       | 2.20  | 477         | 2.27  |
| Dexibuprofen               | 407                             | 2.34  | 250                                       | 1.78  | 432         | 2.01  | 11                              | 1.63  | 15                                        | 0.96  | 7           | 0.72  | 397                             | 2.34  | 235                                       | 1.74  | 426         | 2.02  |
| Pelubiprofen*              | 124                             | 0.71  | 177                                       | 1.26  | 167         | 0.78  | 4                               | 0.59  | 11                                        | 0.70  | 6           | 0.62  | 120                             | 0.71  | 168                                       | 1.24  | 162         | 0.77  |
| Ketorolac                  | 127                             | 0.73  | 186                                       | 1.32  | 149         | 0.69  | 23                              | 3.42  | 107                                       | 6.85  | 52          | 5.35  | 105                             | 0.62  | 82                                        | 0.61  | 98          | 0.47  |
| Nabumetone                 | 72                              | 0.41  | 177                                       | 1.26  | 156         | 0.73  | 12                              | 1.78  | 29                                        | 1.86  | 2           | 0.21  | 62                              | 0.37  | 153                                       | 1.13  | 156         | 0.74  |

|                             |     |      |     |      |     |      |    |      |     |      |    |      |     |      |     |      |     |      |
|-----------------------------|-----|------|-----|------|-----|------|----|------|-----|------|----|------|-----|------|-----|------|-----|------|
| Etodolac                    | 150 | 0.86 | 124 | 0.88 | 121 | 0.56 | 6  | 0.89 | 15  | 0.96 | 1  | 0.10 | 145 | 0.86 | 115 | 0.85 | 120 | 0.57 |
| Celecoxib                   | 50  | 0.29 | 150 | 1.07 | 173 | 0.81 | -  | -    | 4   | 0.26 | 5  | 0.51 | 50  | 0.29 | 147 | 1.09 | 170 | 0.81 |
| Ibuprofen                   | 197 | 1.13 | 45  | 0.32 | 95  | 0.44 | 6  | 0.89 | 2   | 0.13 | 2  | 0.21 | 191 | 1.13 | 43  | 0.32 | 93  | 0.44 |
| Mefenamic acid              | 91  | 0.52 | 60  | 0.43 | 127 | 0.59 | 10 | 1.49 | 12  | 0.77 | 9  | 0.93 | 81  | 0.48 | 49  | 0.36 | 120 | 0.57 |
| Naproxen                    | 66  | 0.38 | 48  | 0.34 | 97  | 0.45 | 8  | 1.19 | 5   | 0.32 | 6  | 0.62 | 58  | 0.34 | 45  | 0.33 | 92  | 0.44 |
| Propofol                    | 1   | 0.01 | 142 | 1.01 | 57  | 0.27 | 1  | 0.15 | 141 | 9.03 | 56 | 5.76 | -   | -    | 1   | 0.01 | 1   | 0.00 |
| Morniflumate                | 56  | 0.32 | 38  | 0.27 | 55  | 0.26 | 5  | 0.74 | 4   | 0.26 | -  | -    | 52  | 0.31 | 36  | 0.27 | 55  | 0.26 |
| Proglumetacin               | 28  | 0.16 | 57  | 0.41 | 38  | 0.18 | 1  | 0.15 | 1   | 0.06 | 1  | 0.10 | 27  | 0.16 | 56  | 0.41 | 37  | 0.18 |
| Nimesulide                  | 45  | 0.26 | 18  | 0.13 | 42  | 0.20 | 1  | 0.15 | 2   | 0.13 | 2  | 0.21 | 44  | 0.26 | 16  | 0.12 | 41  | 0.19 |
| Cyclobenzaprine             | 39  | 0.22 | 25  | 0.18 | 29  | 0.14 | 2  | 0.30 | 4   | 0.26 | 1  | 0.10 | 37  | 0.22 | 22  | 0.16 | 28  | 0.13 |
| Sulindac                    | 8   | 0.05 | 15  | 0.11 | 35  | 0.16 | -  | -    | -   | -    | -  | -    | 8   | 0.05 | 15  | 0.11 | 35  | 0.17 |
| Lornoxicam                  | 12  | 0.07 | 12  | 0.09 | 23  | 0.11 | 1  | 0.15 | -   | -    | -  | -    | 11  | 0.06 | 12  | 0.09 | 23  | 0.11 |
| Hydroxocobalamin            | 11  | 0.06 | 20  | 0.14 | 9   | 0.04 | 8  | 1.19 | 17  | 1.09 | 5  | 0.51 | 3   | 0.02 | 3   | 0.02 | 4   | 0.02 |
| Acetylsalicylic acid        | 9   | 0.05 | 21  | 0.15 | 6   | 0.03 | 2  | 0.30 | 9   | 0.58 | 2  | 0.21 | 7   | 0.04 | 12  | 0.09 | 4   | 0.02 |
| Ketoprofen,<br>combinations | 10  | 0.06 | 19  | 0.14 | 5   | 0.02 | -  | -    | 2   | 0.13 | -  | -    | 10  | 0.06 | 17  | 0.13 | 5   | 0.02 |
| Dexamethasone               | -   | -    | 20  | 0.14 | 5   | 0.02 | -  | -    | 1   | 0.06 | 2  | 0.21 | -   | -    | 19  | 0.14 | 3   | 0.01 |
| Acemetacin                  | 2   | 0.01 | 2   | 0.01 | 9   | 0.04 | -  | -    | -   | -    | -  | -    | 2   | 0.01 | 2   | 0.01 | 9   | 0.04 |
| Oxaprozin                   | -   | -    | 7   | 0.05 | 3   | 0.01 | -  | -    | -   | -    | -  | -    | -   | -    | 7   | 0.05 | 3   | 0.01 |
| Barbiturates, plain         | -   | -    | 5   | 0.04 | 2   | 0.01 | -  | -    | 4   | 0.26 | 2  | 0.21 | -   | -    | 1   | 0.01 | -   | -    |
| Nalbufine                   | -   | -    | 3   | 0.02 | 1   | 0.00 | -  | -    | 3   | 0.19 | -  | -    | -   | -    | -   | -    | 1   | 0.00 |
| Butorphanol                 | -   | -    | 4   | 0.03 | -   | -    | -  | -    | 4   | 0.26 | -  | -    | -   | -    | -   | -    | -   | -    |
| Ketamine                    | -   | -    | 1   | 0.01 | 3   | 0.01 | -  | -    | -   | -    | 1  | 0.10 | -   | -    | 1   | 0.01 | 2   | 0.01 |
| Salsalate                   | 1   | 0.01 | 1   | 0.01 | 1   | 0.00 | -  | -    | 1   | 0.06 | -  | -    | 1   | 0.01 | -   | -    | 1   | 0.00 |
| Almotriptan                 | -   | -    | -   | -    | 3   | 0.01 | -  | -    | -   | -    | -  | -    | -   | -    | -   | -    | 3   | 0.01 |
| Tiaprofenic acid            | -   | -    | 2   | 0.01 | -   | -    | -  | -    | -   | -    | -  | -    | -   | -    | 2   | 0.01 | -   | -    |
| Pranoprofen*                | 1   | 0.01 | -   | -    | -   | -    | -  | -    | -   | -    | -  | -    | 1   | 0.01 | -   | -    | -   | -    |

| Narcotics             |       |    |      |     |      |    |      |    |      |     |      |    |      |    |      |    |      |    |      |
|-----------------------|-------|----|------|-----|------|----|------|----|------|-----|------|----|------|----|------|----|------|----|------|
| Pethidine             |       | 28 | 0.16 | 144 | 1.03 | 74 | 0.35 | 10 | 1.49 | 127 | 8.14 | 56 | 5.76 | 18 | 0.11 | 18 | 0.13 | 18 | 0.09 |
| Codeine, combinations | excl. | 25 | 0.14 | 78  | 0.56 | 74 | 0.35 | 5  | 0.74 | 31  | 1.99 | 26 | 2.67 | 20 | 0.12 | 54 | 0.40 | 53 | 0.25 |
| psycholeptics         |       |    |      |     |      |    |      |    |      |     |      |    |      |    |      |    |      |    |      |
| Remifentanyl          |       | -  | -    | 82  | 0.58 | 40 | 0.19 | -  | -    | 82  | 5.25 | 40 | 4.12 | -  | -    | -  | -    | -  | -    |
| Fentanyl              |       | 1  | 0.01 | 53  | 0.38 | 29 | 0.14 | -  | -    | 53  | 3.40 | 28 | 2.88 | 1  | 0.01 | -  | -    | 1  | 0.00 |
| Oxycodone             |       | -  | -    | 12  | 0.09 | 17 | 0.08 | -  | -    | 6   | 0.38 | 8  | 0.82 | -  | -    | 6  | 0.04 | 10 | 0.05 |
| Morphine              |       | 3  | 0.02 | 8   | 0.06 | 9  | 0.04 | -  | -    | 3   | 0.19 | 3  | 0.31 | 3  | 0.02 | 5  | 0.04 | 8  | 0.04 |
| Hydromorphone         |       | -  | -    | 7   | 0.05 | 7  | 0.03 | -  | -    | 4   | 0.26 | 2  | 0.21 | -  | -    | 3  | 0.02 | 5  | 0.02 |
| Codeine               |       | 2  | 0.01 | 4   | 0.03 | 6  | 0.03 | -  | -    | 2   | 0.13 | 2  | 0.21 | 2  | 0.01 | 2  | 0.01 | 4  | 0.02 |
| Alfentanil            |       | -  | -    | 5   | 0.04 | -  | -    | -  | -    | 5   | 0.32 | -  | -    | -  | -    | -  | -    | -  | -    |

\*Chemical names of drugs with no corresponding 5th level ATC codes.

※ In calculating percentages in number of patients for each respective category, the denominator was the total number of patients for each disorder group.

※ Subjects with any drug prescription code were counted and included as drug treatment recipients regardless of dose.

**S2 Table.** Total analgesics use of sprain/strain of cervical spine, cervical intervertebral disc displacement, and cervicalgia (according to 4<sup>th</sup> level Anatomical Therapeutic Chemical (ATC) Classification System codes)

| Classification                                                | Outpatient+Inpatient            |       |                                           |       |             |       | Inpatient                       |       |                                           |       |             |       | Outpatient                      |       |                                           |       |             |       |
|---------------------------------------------------------------|---------------------------------|-------|-------------------------------------------|-------|-------------|-------|---------------------------------|-------|-------------------------------------------|-------|-------------|-------|---------------------------------|-------|-------------------------------------------|-------|-------------|-------|
|                                                               | Sprain/Strain of cervical spine |       | Cervical intervertebral disc displacement |       | Cervicalgia |       | Sprain/Strain of cervical spine |       | Cervical intervertebral disc displacement |       | Cervicalgia |       | Sprain/Strain of cervical spine |       | Cervical intervertebral disc displacement |       | Cervicalgia |       |
|                                                               | N=17421                         | %     | N=14044                                   | %     | N=21447     | %     | N=673                           | %     | N=1561                                    | %     | N=972       | %     | N=16951                         | %     | N=13517                                   | %     | N=21049     | %     |
| <b>Non-narcotics</b>                                          |                                 |       |                                           |       |             |       |                                 |       |                                           |       |             |       |                                 |       |                                           |       |             |       |
| Acetic acid derivatives and related substances                | 7,451                           | 42.77 | 6,353                                     | 45.24 | 7,454       | 34.76 | 430                             | 63.89 | 1,037                                     | 66.43 | 546         | 56.17 | 7,073                           | 41.73 | 5,730                                     | 42.39 | 7,230       | 34.35 |
| Other opioids                                                 | 4,179                           | 23.99 | 3,966                                     | 28.24 | 4,421       | 20.61 | 316                             | 46.95 | 574                                       | 36.77 | 311         | 32.00 | 3,890                           | 22.95 | 3,533                                     | 26.14 | 4,226       | 20.08 |
| Propionic acid derivatives                                    | 4,561                           | 26.18 | 3,262                                     | 23.23 | 4,308       | 20.09 | 174                             | 25.85 | 326                                       | 20.88 | 164         | 16.87 | 4,413                           | 26.03 | 3,035                                     | 22.45 | 4,204       | 19.97 |
| Other antiinflammatory and antirheumatic agents, non-steroids | 3,270                           | 18.77 | 2,424                                     | 17.26 | 2,939       | 13.70 | 177                             | 26.30 | 314                                       | 20.12 | 133         | 13.68 | 3,107                           | 18.33 | 2,186                                     | 16.17 | 2,859       | 13.58 |
| Oxicams                                                       | 514                             | 2.95  | 1,014                                     | 7.22  | 1,235       | 5.76  | 39                              | 5.79  | 140                                       | 8.97  | 83          | 8.54  | 480                             | 2.83  | 905                                       | 6.70  | 1,169       | 5.55  |
| Other centrally acting agents                                 | 728                             | 4.18  | 433                                       | 3.08  | 703         | 3.28  | 18                              | 2.67  | 36                                        | 2.31  | 19          | 1.95  | 711                             | 4.19  | 405                                       | 3.00  | 689         | 3.27  |
| Anilides                                                      | 486                             | 2.79  | 263                                       | 1.87  | 424         | 1.98  | 28                              | 4.16  | 39                                        | 2.50  | 27          | 2.78  | 458                             | 2.70  | 226                                       | 1.67  | 402         | 1.91  |
| Coxibs                                                        | 50                              | 0.29  | 150                                       | 1.07  | 173         | 0.81  | -                               | -     | 4                                         | 0.26  | 5           | 0.51  | 50                              | 0.29  | 147                                       | 1.09  | 170         | 0.81  |
| Fenamates                                                     | 91                              | 0.52  | 60                                        | 0.43  | 127         | 0.59  | 10                              | 1.49  | 12                                        | 0.77  | 9           | 0.93  | 81                              | 0.48  | 49                                        | 0.36  | 120         | 0.57  |
| Other general anesthetics                                     | 1                               | 0.01  | 143                                       | 1.02  | 59          | 0.28  | 1                               | 0.15  | 141                                       | 9.03  | 56          | 5.76  | -                               | -     | 2                                         | 0.01  | 3           | 0.01  |
| Other nervous system drugs                                    | 11                              | 0.06  | 20                                        | 0.14  | 9           | 0.04  | 8                               | 1.19  | 17                                        | 1.09  | 5           | 0.51  | 3                               | 0.02  | 3                                         | 0.02  | 4           | 0.02  |
| Salicylic acid and derivatives                                | 9                               | 0.05  | 21                                        | 0.15  | 6           | 0.03  | 2                               | 0.30  | 9                                         | 0.58  | 2           | 0.21  | 7                               | 0.04  | 12                                        | 0.09  | 4           | 0.02  |
| Glucocorticoids                                               | -                               | -     | 20                                        | 0.14  | 5           | 0.02  | -                               | -     | 1                                         | 0.06  | 2           | 0.21  | -                               | -     | 19                                        | 0.14  | 3           | 0.01  |
| Morphinan derivatives                                         | -                               | -     | 7                                         | 0.05  | 1           | 0.00  | -                               | -     | 7                                         | 0.45  | -           | 0.00  | -                               | -     | -                                         | -     | 1           | 0.00  |
| Barbiturates, plain                                           | -                               | -     | 5                                         | 0.04  | 2           | 0.01  | -                               | -     | 4                                         | 0.26  | 2           | 0.21  | -                               | -     | 1                                         | 0.01  | -           | 0.00  |
| Selective serotonin (5HT1) agonists                           | -                               | -     | -                                         | -     | 3           | 0.01  | -                               | -     | -                                         | -     | -           | 0.00  | -                               | -     | -                                         | -     | 3           | 0.01  |
| <b>Narcotics</b>                                              |                                 |       |                                           |       |             |       |                                 |       |                                           |       |             |       |                                 |       |                                           |       |             |       |

|                                 |    |      |     |      |     |      |    |      |     |      |    |      |    |      |    |      |    |      |
|---------------------------------|----|------|-----|------|-----|------|----|------|-----|------|----|------|----|------|----|------|----|------|
| Phenylpiperidine derivatives    | 28 | 0.16 | 144 | 1.03 | 74  | 2.01 | 10 | 1.49 | 127 | 8.14 | 56 | 5.76 | 18 | 0.11 | 18 | 0.13 | 18 | 0.09 |
| Natural opium alkaloids         | 27 | 0.15 | 103 | 0.73 | 101 | 0.91 | 5  | 0.74 | 42  | 2.69 | 36 | 3.70 | 22 | 0.13 | 68 | 0.50 | 72 | 0.34 |
| Opioid anesthetics              | 1  | 0.01 | 120 | 0.85 | 62  | 0.86 | -  | -    | 120 | 7.69 | 61 | 6.28 | 1  | 0.01 | -  | -    | 1  | 0.00 |
| Opium alkaloids and derivatives | 2  | 0.01 | 4   | 0.03 | 6   | 0.07 | -  | -    | 2   | 0.13 | 2  | 0.21 | 2  | 0.01 | 2  | 0.01 | 4  | 0.02 |

※ In calculating percentages in number of patients for each respective category, the denominator was the total number of patients for each disorder group.

※ Subjects with any drug prescription code were counted and included as drug treatment recipients regardless of dose.
